# Supplementary material for: Inactivated Vaccine-Induced SARS-CoV-2 Variant-Specific Immunity in Children
Source: PubMed Central journal article supplement (PMC9765711; doi:10.1128/mbio.01311-22), 2022-11-16
Supplement: mbio.01311-22-st001.pdf [file mbio.01311-22-st001.pdf]

**Supplementary Table 1. Frequency of local and systemic immediate adverse events by dose and age group.**

| <b>Frequency of local immediate adverse events by dose and age group.</b>    |                       |                   |                       |
|------------------------------------------------------------------------------|-----------------------|-------------------|-----------------------|
|                                                                              | <b>Dose 1 (n=963)</b> |                   | <b>Dose 2 (n=624)</b> |
|                                                                              |                       | <b>Pain</b>       |                       |
| 3-11 years                                                                   | 33 (3.8)              |                   | 9 (1.7)               |
| 12-17 years                                                                  | 2 (2.2)               |                   | 7 (8.2)               |
|                                                                              |                       | <b>Redness</b>    |                       |
| 3-11 years                                                                   | 20 (2.3)              |                   | 3 (0.6)               |
| 12-17 years                                                                  | 0                     |                   | 0                     |
|                                                                              |                       | <b>Induration</b> |                       |
| 3-11 years                                                                   | 5 (0.6)               |                   | 0                     |
| 12-17 years                                                                  | 1 (1.1)               |                   | 0                     |
|                                                                              |                       | <b>Pruritus</b>   |                       |
| 3-11 years                                                                   | 2 (0.2)               |                   | 0                     |
| 12-17 years                                                                  | 0                     |                   | 1 (1.2)               |
|                                                                              |                       | <b>Swelling</b>   |                       |
| 3-11 years                                                                   | 0                     |                   | 0                     |
| 12-17 years                                                                  | 1 (1.1)               |                   | 0                     |
|                                                                              |                       | <b>Other</b>      |                       |
| 3-11 years                                                                   | 1 (0.1)               |                   | 1 (0.2)               |
| 12-17 years                                                                  | 0                     |                   | 0                     |
| <b>Frequency of systemic immediate adverse events by dose and age group.</b> |                       |                   |                       |
|                                                                              |                       | <b>Headache</b>   |                       |
| 3-11 years                                                                   | 6 (0.7)               |                   | 1 (0.2)               |
| 12-17 years                                                                  | 2 (2.2)               |                   | 1 (1.2)               |
|                                                                              |                       | <b>Fatigue</b>    |                       |
| 3-11 years                                                                   | 4 (0.5)               |                   | 1 (0.2)               |
| 12-17 years                                                                  | 0                     |                   | 0                     |

| <b>Muscle pain</b>                |         |          |
|-----------------------------------|---------|----------|
| 3-11 years                        | 1 (0.1) | 0        |
| 12-17 years                       | 0       | 1 (1.2)  |
| <b>Nausea</b>                     |         |          |
| 3-11 years                        | 1 (0.1) | 0        |
| 12-17 years                       | 0       | 0        |
| <b>Skin or mucosa abnormality</b> |         |          |
| 3-11 years                        | 0       | 0        |
| 12-17 years                       | 0       | 1* (1.2) |

\* **Generalized pruritus, without rash or other symptoms, mild and self-limited**

- *Total volunteers for first dose (n=963): 3-11 years (n=873) and 12-17 years (n=90)*
- *Total volunteers for second dose (n=624): 3-11 years (n=539) and 12-17 years (n=85)*
-
