# Supplementary material for: Inactivated Vaccine-Induced SARS-CoV-2 Variant-Specific Immunity in Children
Source: PubMed Central journal article supplement (PMC9765711; doi:10.1128/mbio.01311-22), 2022-11-16
Supplement: mbio.01311-22-st002.pdf [file mbio.01311-22-st002.pdf]

**Supplementary Table 2. Description of allergic reactions following vaccination in the 3-11 age group**

|                  | <b>Allergic reaction</b>                                                                                                                                                                 | <b>Timing</b>                                                                                                               | <b>Severity</b>                                                | <b>Classification by investigator</b> |
|------------------|------------------------------------------------------------------------------------------------------------------------------------------------------------------------------------------|-----------------------------------------------------------------------------------------------------------------------------|----------------------------------------------------------------|---------------------------------------|
| <b>Subject 1</b> | Left arm rash (same arm of inoculation)                                                                                                                                                  | Three days after 1st dose, lasting seven days                                                                               | Grade 1 in severity (mild)                                     | Possible                              |
| <b>Subject 2</b> | Rash around mouth and nose                                                                                                                                                               | One day after 1st dose and lasted three days                                                                                | Grade 1 in severity (mild)                                     | Not related                           |
| <b>Subject 3</b> | Rash in her/his back                                                                                                                                                                     | Three days after 1st dose and last two days                                                                                 | Grade 1 in severity (mild)                                     | Not related                           |
| <b>Subject 4</b> | Rash and pruritus in both arms                                                                                                                                                           | Eighteen days after 1st dose, lasting one day                                                                               | Grade 1 in severity (mild)                                     | Not related                           |
| <b>Subject 5</b> | This subject presented two allergic reactions<br>a) Rash in her/his face after visiting a farm<br>b) Rash in face and arms                                                               | a) Eighteen days after 1st dose lasting seven days.<br>b) Three days after 1st dose, lasting one day without any medication | a) Grade 1 in severity (mild)<br>b) Grade 1 in severity (mild) | a) Not related<br>b) Probable         |
| <b>Subject 6</b> | The subject has antecedents of atopy and has already facial rash before vaccination but an exacerbation of this rash in her/his face, trunk and arms occurred after vaccination          | Three days after 1st dose. The duration is unknown                                                                          | Grade 2 in severity (moderate)                                 | Probable                              |
| <b>Subject 7</b> | Genital and perianal rash                                                                                                                                                                | Two days after 1st dose. The duration is unknown                                                                            | Grade 2 in severity (moderate)                                 | Unlikely                              |
| <b>Subject 8</b> | The subject presented pruritic papules on both arms, which require medication with corticosteroids and antihistamines. This episode coincides with the arrival of a new pet in the house | Seven days after 2nd dose, lasting 17 days, needing medication                                                              | Grade 2 in severity (moderate)                                 | Unlikely                              |
