# Supplementary material for: Inactivated Vaccine-Induced SARS-CoV-2 Variant-Specific Immunity in Children
Source: PubMed Central journal article supplement (PMC9765711; doi:10.1128/mbio.01311-22), 2022-11-16
Supplement: mbio.01311-22-st003.pdf [file mbio.01311-22-st003.pdf]

**Supplementary Table 3: Baseline characteristics of 92 participants in immunogenicity group.**

|                                         | <b>3-11 years old group<br/>n=55</b> | <b>12-17 years old group<br/>n=37</b> |
|-----------------------------------------|--------------------------------------|---------------------------------------|
| <b>Age years, mean (SD)</b>             | 7,73 (2,77)                          | 13.7 (1.62)                           |
| <b>Gender female, n (%)</b>             | 31 (56,4%)                           | 21 (56,8%)                            |
| <b>With Co-morbidities, n (%)</b>       | 35 (63,6%)                           | 24 (64,9%)                            |
| <b>Obesity, n</b>                       | 2                                    | 4                                     |
| <b>ENT<sup>a</sup> surgery, n</b>       | 13                                   | 6                                     |
| <b>Mental health<sup>b</sup>, n</b>     | 5                                    | 7                                     |
| <b>Drugs allergy, n</b>                 | 0                                    | 4                                     |
| <b>Atopy<sup>c</sup>, n</b>             | 20                                   | 9                                     |
| <b>Asthma, n</b>                        | 6                                    | 4                                     |
| <b>Surgeries, n</b>                     | 0                                    | 8                                     |
| <b>Chromosomopathies<sup>d</sup>, n</b> | 2                                    | 0                                     |
| <b>Others, n</b>                        | 15                                   | 12                                    |

<sup>a</sup>ear, nose and throat

<sup>b</sup>anxiety disorders, ADHD, ASD

<sup>c</sup>allergic rhinitis -atopic dermatitis

<sup>d</sup>Down Syndrome and Turner Syndrome
