# Supplementary material for: Inactivated Vaccine-Induced SARS-CoV-2 Variant-Specific Immunity in Children
Source: PubMed Central journal article supplement (PMC9765711; doi:10.1128/mbio.01311-22), 2022-11-16
Supplement: mbio.01311-22-st004.pdf [file mbio.01311-22-st004.pdf]

**Supplementary Table 4A: Seropositivity rates, Geometric Mean Units (GMU) or titers (GMT) of circulating antibodies against SARS-CoV-2.**

| Test                           | Parameter          | Age Group   |           |
|--------------------------------|--------------------|-------------|-----------|
|                                |                    | 3-11        | 12-17     |
| Total IgG anti S1-SARS-CoV-2   | Seropositivity n/N | 24/25       | 34/36     |
|                                | (%)                | 96          | 94.5      |
|                                | GMU                | 964.9       | 680.6     |
|                                | 95% CI             | 503-1850    | 371-1245  |
| Neutralizing antibodies (sVNT) | Seropositivity n/N | 55/55       | 37/37     |
|                                | (%)                | 100         | 100       |
|                                | GMU                | 999.8       | 492.2     |
|                                | 95% CI             | 565.8-898.8 | 342-708.3 |
| Neutralizing antibodies (cVNT) | Seropositivity n/N | 27/27       | 30/34     |
|                                | (%)                | 100         | 88.2      |
|                                | GMT                | 146.3       | 38.6      |
|                                | 95% CI             | 93.96-227.6 | 21.1-70.7 |

**Supplementary Table 4B: Seropositivity rates, Geometric Mean titers (GMT) of circulating antibodies against variant of concern of SARS-CoV-2.**

| Test                           | Parameter          | Variant     |             |           |
|--------------------------------|--------------------|-------------|-------------|-----------|
|                                |                    | D614G       | Delta       | Omicron   |
| Neutralizing antibodies (pVNT) | Seropositivity n/N | 88/88       | 86/88       | 40/88     |
|                                | (%)                | 100         | 97.7        | 45.5      |
|                                | GMT                | 265.4       | 141.6       | 16.81     |
|                                | 95% CI             | 213.1-330.5 | 113.6-176.5 | 14.0-20.3 |
